# Supplementary material
Source: publisher site journal article supplement (https://www.spandidos-publications.com/1681/downloadSupplementary)
Supplement: Supplementary file 1 [file downloadSupplementary]

## Sheet: Table S4
Table SIV. List of the known sRNAs differentially expressed in asymptomatic HTLV-1 infected subjects with monoclonal T cell expansion (ASM) and asymptomatic HTLV-1 infected subjects with polyclonal T cell expansion versus healthy controls (HC)
Gene ID	p (Corr)	p	FC ([ASM] vs [HC])	Log FC ([ASM] vs [HC])	FC (abs) ([ASM] vs [HC])	Regulation ([ASM] vs [HC])	FC ([ASP] vs [HC])	Log FC ([ASP] vs [HC])	FC (abs) ([ASP] vs [HC])	Regulation ([ASP] vs [HC])	Accession	Entrez ID	Ensembl ID	Gene Type	DB Refs
MI0000483	2.83E-09	3.35E-10	-4856258	-2279845	4856258	down	-5685015	-25071642	5685015	down	hsa-mir-186	406962		miRNA	miRBase:MI0000483
chr1.trna35	0.040579304	0.028832665	30739703	16201032	30739703	up	16535789	0.72559184	16535789	up	trna35			tRNA
chr1.trna37	0.040579304	0.028832665	30739703	16201032	30739703	up	16535789	0.72559184	16535789	up	trna37			tRNA
chr1.trna39	0.040579304	0.028832665	30739703	16201032	30739703	up	16535789	0.72559184	16535789	up	trna39			tRNA
chr1.trna41	0.040579304	0.028832665	30739703	16201032	30739703	up	16535789	0.72559184	16535789	up	trna41			tRNA
chr1.trna68	5.33E-05	1.89E-05	-14276532	-38355737	14276532	down	-9887073	-33055434	9887073	down	trna68			tRNA
MI0000291	2.06E-06	4.60E-07	-16920479	-40806985	16920479	down	-105389385	-33976576	105389385	down	hsa-mir-215	406997	ENSG00000207590	miRNA	miRBase:MI0000291
MI0017308	0.001050944	5.53E-04	-24592097	-12981948	24592097	down	-25536637	-13525686	25536637	down	hsa-mir-4677	100616343		miRNA	miRBase:MI0017308
ENSG00000241885	0.04810311	0.035444397	23356655	12238337	23356655	up	12233293	0.29081285	12233293	up	TRNAE40P		ENSG00000241885	tRNA_pseudogene	RFAM:RF00005
chr2.trna17	0.04810311	0.035444397	23356655	12238337	23356655	up	12233293	0.29081285	12233293	up	trna17			tRNA
ENSG00000222345	5.10E-05	1.74E-05	6936556	27942195	6936556	up	52703304	23978934	52703304	up	SNORD19		ENSG00000222345	snoRNA	RFAM:RF00569
MI0003583	0.001027797	5.27E-04	-4028607	-2010281	4028607	down	-35061383	-18098829	35061383	down	hsa-mir-576	693161		miRNA	miRBase:MI0003583
ENSG00000239286	0.021341735	0.012917366	-28806536	-15263962	28806536	down	-30866594	-16260463	30866594	down	AC109927.1		ENSG00000239286	scRNA_pseudogene
MI0000786	5.79E-04	2.67E-04	25454006	13478928	25454006	up	1880207	0.9108915	1880207	up	hsa-mir-378a	494327		miRNA	miRBase:MI0000786
chr6.trna62	8.03E-06	2.22E-06	-6863119	-27788644	6863119	down	-5144012	-2362894	5144012	down	trna62			tRNA
ENSG00000221500	5.83E-08	9.21E-09	4484999	54870358	4484999	up	31635664	498348	31635664	up	SNORD100	594838	ENSG00000221500	snoRNA	RFAM:RF00609
MI0003600	4.80E-10	3.79E-11	-35900528	-5165933	35900528	down	-29631672	-4889068	29631672	down	hsa-mir-550a-1	693133		miRNA	miRBase:MI0003600
MI0003601	4.80E-10	3.79E-11	-35900528	-5165933	35900528	down	-29631672	-4889068	29631672	down	hsa-mir-550a-2	693134	ENSG00000207573	miRNA	miRBase:MI0003601
MI0000272	1.26E-06	2.48E-07	-19685276	-4299045	19685276	down	-1668866	-40607963	1668866	down	hsa-mir-182	406958	ENSG00000207990	miRNA	miRBase:MI0000272
MI0002470	1.66E-08	2.40E-09	-15701469	-39728277	15701469	down	-15352539	-39404054	15352539	down	hsa-mir-486	619554		miRNA	miRBase:MI0002470
MI0000439	9.72E-11	3.84E-12	9108273	65091057	9108273	up	73021385	6190247	73021385	up	hsa-mir-23b	407011		miRNA	miRBase:MI0000439
MI0016747	4.19E-04	1.79E-04	-56747737	-25045629	56747737	down	-846307	-3081181	846307	down	hsa-mir-1254-2	100616217	ENSG00000264574	miRNA	miRBase:MI0016747
MI0006388	4.19E-04	1.82E-04	-56747737	-25045629	56747737	down	-8258392	-3045861	8258392	down	hsa-mir-1254-1	100302273		miRNA	miRBase:MI0006388
MI0003129	7.17E-04	3.40E-04	22159107	11478997	22159107	up	32228963	16883578	32228963	up	hsa-mir-146b	574447	ENSG00000202569	miRNA	miRBase:MI0003129
MI0006444	0.001136879	6.13E-04	-41809597	-20638342	41809597	down	-3377862	-17561104	3377862	down	hsa-mir-1307	100302174	ENSG00000221767	miRNA	miRBase:MI0006444
chr11.trna12	1.82E-04	6.71E-05	-4456842	-21560218	4456842	down	-4838725	-2274627	4838725	down	trna12			tRNA
ENSG00000202314	5.71E-04	2.56E-04	11272555	34947426	11272555	up	11853713	35672672	11853713	up	SNORD6	692075	ENSG00000202314	snoRNA	RFAM:RF00342
MI0000061	5.01E-05	1.65E-05	3009537	15895416	3009537	up	37073052	18903708	37073052	up	hsa-let-7a-2	406882	ENSG00000198975	miRNA	miRBase:MI0000061|RFAM:RF00027
MI0000102	0.002161265	0.001194383	-17640453	-41408157	17640453	down	-141550865	-38232486	141550865	down	hsa-mir-100	406892	ENSG00000207994	miRNA	miRBase:MI0000102|RFAM:RF00104
MI0000071	9.15E-04	4.54E-04	-2763892	-14667013	2763892	down	-26128366	-13856169	26128366	down	hsa-mir-17	406952	ENSG00000215417	miRNA	miRBase:MI0000071|RFAM:RF00051
MI0000072	3.05E-06	7.21E-07	-18123438	-4179785	18123438	down	-11706257	-3549208	11706257	down	hsa-mir-18a	406953		miRNA	miRBase:MI0000072
chr14.trna13	2.23E-04	9.10E-05	63978443	26775858	63978443	up	4086399	20308301	4086399	up	trna13			tRNA
MI0000825	9.68E-07	1.78E-07	-7121257	-28321319	7121257	down	-56636677	-25017366	56636677	down	hsa-mir-345	442910	ENSG00000198984	miRNA	miRBase:MI0000825
ENSG00000199214	1.29E-06	2.72E-07	1472754	38804445	1472754	up	11149496	34789066	11149496	up	Y_RNA		ENSG00000199214	scRNA	RFAM:RF00019
chr15.trna11	9.15E-04	4.58E-04	5157104	23665612	5157104	up	33248765	17333008	33248765	up	trna11			tRNA
chr15.trna2	1.94E-04	7.65E-05	64360204	2686169	64360204	up	40754375	2026955	40754375	up	trna2			tRNA
MI0014210	2.23E-05	6.45E-06	-16167458	-4015021	16167458	down	-7725609	-29496486	7725609	down	hsa-mir-3176	100423037		miRNA	miRBase:MI0014210
chr16.trna10	4.77E-05	1.51E-05	9217645	32043982	9217645	up	57400775	25210702	57400775	up	trna10			tRNA
chr16.trna27	1.94E-04	7.67E-05	2975269	15730201	2975269	up	70403194	2815641	70403194	up	trna27			tRNA
ENSG00000199949	4.25E-05	1.29E-05	-63355193	-26634629	63355193	down	-73754764	-28827362	73754764	down	Y_RNA		ENSG00000199949	scRNA	RFAM:RF00019
chr17.trna7	5.12E-06	1.35E-06	-7070066	-28217237	7070066	down	-52975707	-2405331	52975707	down	trna7			tRNA
MI0000460	1.33E-10	7.01E-12	-71237537	-9476494	71237537	down	-53031506	-9050706	53031506	down	hsa-mir-144	406936	ENSG00000264066	miRNA	miRBase:MI0000460
MI0000745	0.00349736	0.001978769	-32142472	-16844809	32142472	down	-23533404	-123471	23533404	down	hsa-mir-301a	407027		miRNA	miRBase:MI0000745
MI0000077	1.42E-09	1.50E-10	52065887	23803384	52065887	up	49236474	22997274	49236474	up	hsa-mir-21	406991	ENSG00000199004	miRNA	miRBase:MI0000077
MI0000079	9.23E-11	2.43E-12	40891735	53537374	40891735	up	3842049	5263804	3842049	up	hsa-mir-23a	407010	ENSG00000207980	miRNA	miRBase:MI0000079
MI0000746	0.040579304	0.028264321	3193406	1675096	3193406	up	2855273	15136287	2855273	up	hsa-mir-99b	407056	ENSG00000207550	miRNA	miRBase:MI0000746
ENSG00000251806	7.56E-09	9.95E-10	3666118	51961813	3666118	up	44578003	547826	44578003	up	SNORD119	100113378	ENSG00000251806	snoRNA	RFAM:RF00570
ENSG00000221116	0.017426947	0.010318588	42721925	20949767	42721925	up	80433035	30077882	80433035	up	SNORD110	692213	ENSG00000221116	snoRNA	RFAM:RF00610
ENSG00000212232	5.08E-10	4.68E-11	19902727	4314894	19902727	up	12091228	35958889	12091228	up	SNORD17	692086	ENSG00000212232	snoRNA	RFAM:RF00567
chr21.trna2	0.027712014	0.017502325	3405706	17679539	3405706	up	18241256	0.8672051	18241256	up	trna2			tRNA
MI0000681	1.11E-11	1.46E-13	13479913	70746675	13479913	up	8094559	63388805	8094559	up	hsa-mir-155	406947	ENSG00000234883	miRNA	miRBase:MI0000681
MI0020364	1.11E-07	1.90E-08	5108046	23527715	5108046	up	6224019	26378465	6224019	up	hsa-mir-6087			miRNA	miRBase:MI0020364
MI0001519	3.34E-06	8.35E-07	-10969792	-34554644	10969792	down	-7946762	-29903672	7946762	down	hsa-mir-20b	574032	ENSG00000207710	miRNA	miRBase:MI0001519
